# Supplementary material for: Hyaluronic acid inhibition by 4-methylumbelliferone reduces the expression of cancer stem cells markers during hepatocarcinogenesis
Source: PubMed Central journal article supplement (PMC6411988; doi:10.1038/s41598-019-40436-6), 2019-03-11
Supplement: 41598_2019_40436_MOESM1_ESM.pdf [file 41598_2019_40436_MOESM1_ESM.pdf]

## **Hyaluronic acid inhibition by 4-methylumbelliferone reduces the expression of cancer stem cells markers during hepatocarcinogenesis**

Caecilia H C Sukowati<sup>1,2\*</sup>, Beatrice Anfuso<sup>1</sup>, Esteban Fiore<sup>3</sup>, Susan I Ie<sup>4</sup>, Alan Raseni<sup>5</sup>, Fulvia Vascotto<sup>5</sup>, Claudio Avellini<sup>6</sup>, Guillermo Mazzolini<sup>3</sup>, Claudio Tiribelli<sup>1</sup>

1. Fondazione Italiana Fegato, AREA Science Park Basovizza, SS14 km 163.5, 34149 Trieste, Italy
2. Department of Medicine. University of Udine. Piazzale M. Kolbe 1, 33100 Udine, Italy
3. Gene Therapy Laboratory, Facultad de Ciencias Biomédicas, Universidad Austral, Avenida Presidente Perón 1500, B1629ODT Derqui-Pilar, Buenos Aires, Argentina
4. Laboratory of Hepatitis and Emerging Diseases, Eijkman Institute for Molecular Biology, Jl. Diponegoro 69, 10310 Jakarta, Indonesia
5. Institute for Maternal and Child Health - Institute for Research and Health Care Burlo Garofolo, Via dell'Istria, 65, 34137 Trieste, Italy
6. Department of Medical and Biological Sciences, University Hospital Santa Maria della Misericordia, Piazzale Santa Maria della Misericordia 15, 33100 Udine, Italy

\*Correspondence and requests for materials should be addressed to CHCS

[caecilia.sukowati@fegato.it](mailto:caecilia.sukowati@fegato.it)

## Supplementary Figure

**Fig. S1.** Unprocessed original scans of Western blot in Fig 5B.

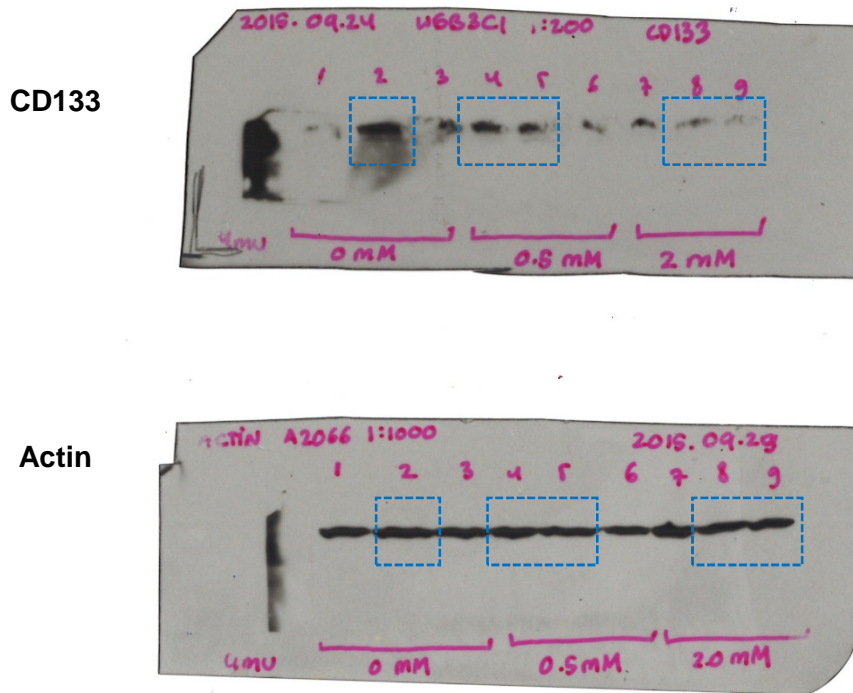

**Fig. S2.** EMT gene analysis on HCC cell lines treated with 4MU.

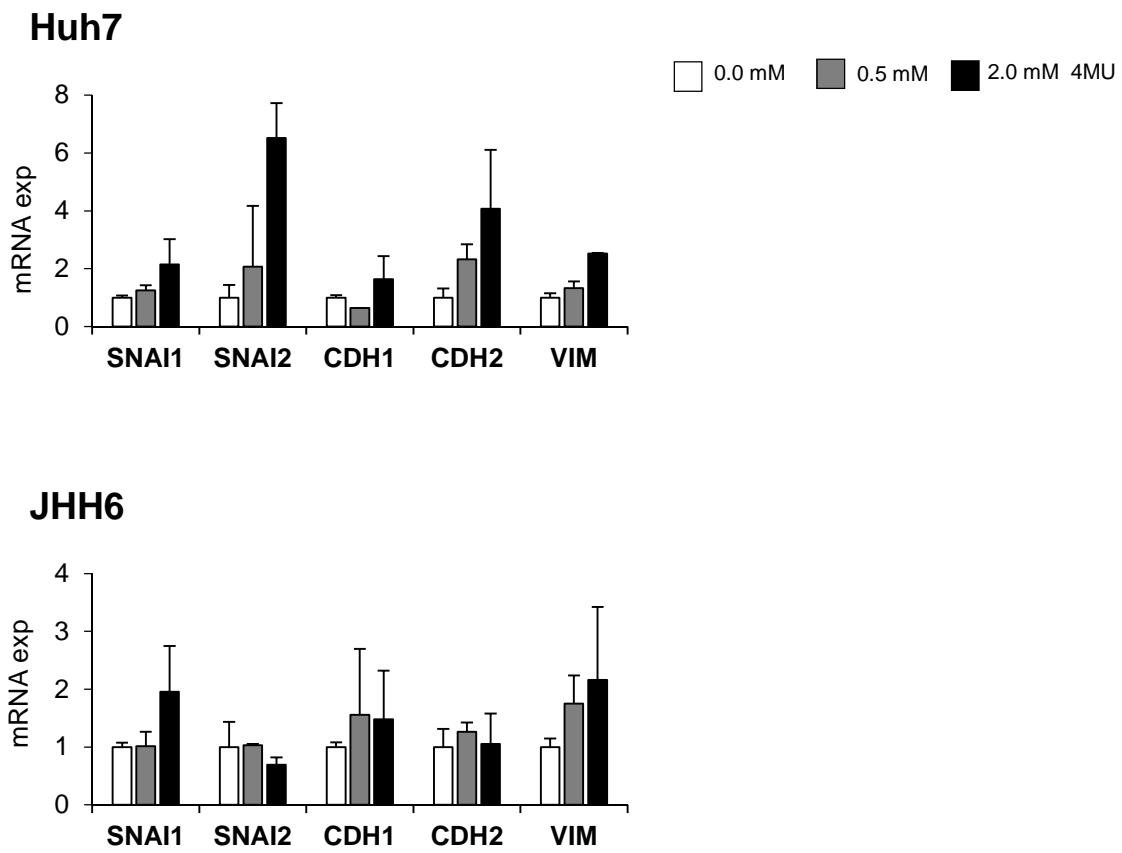

**Fig. S3.** The staining of HA-coated plate by Alcianblue 8GX showing the positivity of HA.

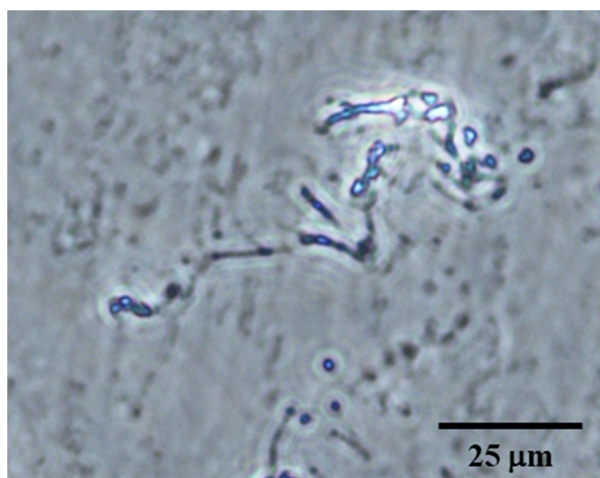

## Supplementary Table

Table S1. List of primers used in this study

| Gene             | Primer F (5' → 3')           | Primer R (5' → 3')         | Ref        |
|------------------|------------------------------|----------------------------|------------|
| <b>Human</b>     |                              |                            |            |
| 18sr-RNA         | TAACCCGTTGAACCCCAT           | CCATCCAATCGGTAGTAGCG       | 1          |
| ACTB             | CGCCGCCAGCTCACCATG           | CACGATGGAGGGGAAGACGG       | This study |
| EpCAM            | GAATAATAATCGTCAATGCCAGTG     | CGCTCTCATCGCAGTCAG         | This study |
| CD90/THY-1       | AGAGACTTGGATGAGGAG           | CTGAGAATGCTGGAGATG         | This study |
| CD133/Prominin 1 | CATCTGCTCTCTGCTGAC           | AACTTAATCCAACCTCCAACC      | This study |
| CD44             | AGGAAGAAGGATGGATATGGACTC     | TTACTCTGCTGCGTTGTCATTG     | This study |
| HAS1             | TACAACCAGAAGTTCCTGGG         | CTGGAGGTGTACTTGGTAGC       | 2          |
| HAS2             | GTGGATTATGTACAGGTTTGTGA      | TCCAACCATGGGATCTTCTT       | 2          |
| HAS3             | GAGATGTCCAGATCCTCAACAA       | CCCACTAATACTGCACAC         | 2          |
| HYAL1            | GATGTCAGTGTCTTCGATGTGGTA     | GGGAGCTATAGAAAATTGTCATGTCA | 3          |
| HYAL2            | CTAATGAGGGTTTTGTGAACCAGAATAT | GCAGAATCGAAGCGTGGATAC      | 3          |
| CDH1             | GGA ACTATGAAAAGTGGGCTTG      | AAATTGCCAGGCTCAATGAC       | 4          |
| CDH2             | GACGGTTCGCCATCCAGAC          | TCGATTGGTTTTGACCACGG       | 5          |
| VIM              | AACTTCTCAGCATCACGATGAC       | TTGTAGGAGTGTCGGTTGTTAAG    | This study |
| BCL2a            | GTGTGTGGAGAGCGTCAAC          | CGGTTCAAGTACTCAGTCATC      | This study |

|                  |                        |                       |            |
|------------------|------------------------|-----------------------|------------|
| BAX              | TCGCCCTTTTCTACTTTG     | CCCATGATGGTTCTGATC    | This study |
| PUMA             | CCTGTAAGATACTGTATATGC  | CCACTGTTCCAATCTGAT    | This study |
| <b>Mouse</b>     |                        |                       |            |
| Gapdh            | CCAGTATGACTCCACTCACG   | CTCGCTCCTGGAAGATGGTG  | 6          |
| Actb             | AATAAGTGGTTACAGGAAGTC  | ATGAAGTATTAAGGCGGAAG  | 7          |
| Has1             | TTCCACTGTGTGTCCTGCAT   | TGTACCAGGCCTCCAAGAAC  | 8          |
| Has2             | GGGACCTGGTGAGACAGAAG   | ATGAGGCAGGGTCAAGCATA  | 8          |
| Has3             | TCCCCAAGTAGGAGGTGTTG   | TTGCACACAGCCAAAGTAGG  | 8          |
| Hyal1            | CCGTAATGCCCTACGTCCAGA  | GCCTGGCATGATTCCTTGGT  | 8          |
| Hyal2            | AGCCGCAACTTTGTCAGTTT   | GAGTCCTCGGGTGTATGTGG  | 8          |
| Cd44             | CTCCTGAAGAAGACTGTA     | CACGGTTGACAATAGTTAT   | This study |
| Cd90             | AACTTCACCACCAAGGAT     | TTGTCTCTATACACTGATACT | 8          |
| Epcam            | ATTGTGGTGGTGTCCATTAG   | TCCTTTATCTCAGCCTTCT   | This study |
| Fsp1             | CAGAAGGTGATGAGCAACT    | AGGACAGGAAGACACAGTA   | This study |
| Acta2            | GGCATCAATCACTTCAAC     | TCTGGTCACCTGTATGTA    | This study |
| CD133/Prominin 1 | GACATCTCAGTTGATTCCAAGG | CATGGCGCATTCTGCTTCTGC | 9          |

### References:

1. Schmittgen, T. D. & Zakrajsek, B. A. Effect of experimental treatment on housekeeping gene expression: validation by real-time, quantitative RT-PCR. *J. Biochem. Biophys. Methods* **46**, 69–81 (2000).

2. Twarock, S. *et al.* Synthesis of hyaluronan in oesophageal cancer cells is uncoupled from the prostaglandin-cAMP pathway. *Br. J. Pharmacol.* **157**, 234–243 (2009).
3. Li, L., Asteriou, T., Bernert, B., Heldin, C. H. & Heldin, P. Growth factor regulation of hyaluronan synthesis and degradation in human dermal fibroblasts: importance of hyaluronan for the mitogenic response of PDGF-BB. *Biochem. J.* **404**, 327–336 (2007).
4. Lin, C. W. *et al.* Epithelial cell adhesion molecule regulates tumor initiation and tumorigenesis via activating reprogramming factors and epithelial-mesenchymal transition gene expression in colon cancer. *J. Biol. Chem.* **287**, 39449–39459 (2012).
5. Kroepil, F. *et al.* Down-regulation of CDH1 is associated with expression of SNAIL1 in colorectal adenomas. *PLoS One* **7**, e46665 (2012).
6. Hayashi, A., Suzuki, H., Itoh, K., Yamamoto, M. & Sugiyama, Y. Transcription factor Nrf2 is required for the constitutive and inducible expression of multidrug resistance-associated protein 1 in mouse embryo fibroblasts. *Biochem. Biophys. Res. Commun.* **310**, 824–829 (2003).
7. Raab, R. M., Bullen, J., Kelleher, J., Mantzoros, C. & Stephanopoulos, G. Regulation of mouse hepatic genes in response to diet induced obesity, insulin resistance and fasting induced weight reduction. *Nutr. Metab.* **2**, 15 (2005).
8. Hunt, L. C. *et al.* Hyaluronan synthesis and myogenesis: a requirement for hyaluronan synthesis during myogenic differentiation independent of pericellular matrix formation. *J. Biol. Chem.* **288**, 13006–13021 (2013).
9. Kemper, K., Tol, M. J. P. M. & Medema, J. P. Mouse tissues express multiple splice variants of prominin-1. *PLoS One* **5**, e12325 (2010).
